# Supplementary material for: metaPR2 : A database of eukaryotic 18S rRNA metabarcodes with an emphasis on protists
Source: PubMed Central journal article supplement (PMC9796713; doi:10.1111/1755-0998.13674), 2022-07-13
Supplement: MEN-22-3188-s001.pdf [file MEN-22-3188-s001.pdf]

## Supplementary Material for

# metaPR<sup>2</sup>: a database of eukaryotic 18S rRNA metabarcodes with an emphasis on protists.

Daniel Vaultot<sup>1</sup> ✉ , Clarence Wei Hung Sim<sup>2</sup>, Denise Ong<sup>2</sup> , Bryan Teo<sup>2</sup>, Charlie Biver<sup>3</sup>, Mahwash Jamy<sup>3</sup>, Adriana Lopes dos Santos<sup>2</sup> 

<sup>1</sup> UMR 7144, ECOMAP, CNRS, Sorbonne Université, Station Biologique de Roscoff, 29680 Roscoff, France

<sup>2</sup> Asian School of the Environment, Nanyang Technological University, 50 Nanyang Avenue, Singapore 639798

<sup>3</sup> Department of Organismal Biology (Systematic Biology), Uppsala University, Uppsala, Sweden

### ORCID

- Daniel Vaultot: 0000-0002-0717-5685
- Adriana Lopes dos Santos: 0000-0002-0736-4937
- Denise Ong: 0000-0001-6053-6948
- Clarence Wei Hung Sim: 0000-0003-2190-7261
- Mahwash Jamy: 0000-0002-2930-9226

✉ Corresponding author: vaultot@gmail.com

Submitted to **Molecular Ecology Resources**

Date: May 26, 2022

**Keywords:** 18S rRNA, metabarcodes, database, R, shiny, PCR, protists

**Short title:** metaPR<sup>2</sup> - a database of eukaryotic metabarcodes

**Table S1:** Ecological function of taxa according to Table S1 of Sommeria-Klein et al. (2021). Taxa present in the PR2 database for which ecological function was not present in Table S1 were assigned an ecological function based on the literature. Ecological function was propagated to all taxa below the taxon for which it was defined using an R script.

| Taxon                 | Taxonomic level | Function        | Reference                  |
|-----------------------|-----------------|-----------------|----------------------------|
| Acantharea            | class           | phagotrophs     | Sommeria-Klein et al. 2021 |
| Annelida              | class           | metazoans       | Sommeria-Klein et al. 2021 |
| Apicomplexa           | class           | parasites       | Sommeria-Klein et al. 2021 |
| Arthropoda            | class           | metazoans       | Sommeria-Klein et al. 2021 |
| Endomyxa-Ascetosporea | class           | parasites       | Sommeria-Klein et al. 2021 |
| Ascomycota            | class           | phagotrophs     | Sommeria-Klein et al. 2021 |
| Bacillariophyta       | class           | phototrophs     | Sommeria-Klein et al. 2021 |
| Basidiomycota         | class           | phagotrophs     | Sommeria-Klein et al. 2021 |
| Bicoecea              | class           | phagotrophs     | Sommeria-Klein et al. 2021 |
| Bolidophyceae         | class           | phototrophs     | Sommeria-Klein et al. 2021 |
| Bryozoa               | class           | metazoans       | Sommeria-Klein et al. 2021 |
| Chaetognatha          | class           | metazoans       | Sommeria-Klein et al. 2021 |
| Chlorarachniophyceae  | class           | phototrophs     | Sommeria-Klein et al. 2021 |
| Chlorophyceae         | class           | phototrophs     | Sommeria-Klein et al. 2021 |
| Chloropicophyceae     | class           | phototrophs     | Sommeria-Klein et al. 2021 |
| Choanoflagellata      | class           | phagotrophs     | Sommeria-Klein et al. 2021 |
| Chromodellids         | division        | phagotrophs     | Sommeria-Klein et al. 2021 |
| Chrysophyceae         | class           | phototrophs     | Sommeria-Klein et al. 2021 |
| Chytridiomycota       | class           | parasites       | Sommeria-Klein et al. 2021 |
| Ciliophora            | division        | phagotrophs     | Sommeria-Klein et al. 2021 |
| Cnidaria              | class           | metazoans       | Sommeria-Klein et al. 2021 |
| Cryomonadida          | class           | phagotrophs     | Sommeria-Klein et al. 2021 |
| Cryptophyta           | division        | phototrophs     | Sommeria-Klein et al. 2021 |
| Ctenophora            | class           | metazoans       | Sommeria-Klein et al. 2021 |
| Dactylopodida         | order           | parasites       | Sommeria-Klein et al. 2021 |
| Dictyochophyceae      | class           | phototrophs     | Sommeria-Klein et al. 2021 |
| Dinophyceae           | class           | dinoflagellates | Sommeria-Klein et al. 2021 |
| Diplonemida           | order           | phagotrophs     | Sommeria-Klein et al. 2021 |
| Ebriida               | order           | phagotrophs     | Sommeria-Klein et al. 2021 |
| Echinodermata         | class           | metazoans       | Sommeria-Klein et al. 2021 |
| Eucyrtidium           | genus           | phagotrophs     | Sommeria-Klein et al. 2021 |
| Euglenida             | class           | phagotrophs     | Sommeria-Klein et al. 2021 |

**Table S1:** *(continued)*

| Taxon               | Taxonomic level | Function    | Reference                  |
|---------------------|-----------------|-------------|----------------------------|
| Foraminifera        | division        | phagotrophs | Sommeria-Klein et al. 2021 |
| Haptophyta          | division        | phototrophs | Sommeria-Klein et al. 2021 |
| Katablepharidophyta | division        | phagotrophs | Sommeria-Klein et al. 2021 |
| Kinetoplastea       | class           | parasites   | Sommeria-Klein et al. 2021 |
| Labyrinthulomycetes | class           | phagotrophs | Sommeria-Klein et al. 2021 |
| Dino-Group-I        | order           | parasites   | Sommeria-Klein et al. 2021 |
| Dino-Group-II       | order           | parasites   | Sommeria-Klein et al. 2021 |
| Dino-Group-III      | order           | parasites   | Sommeria-Klein et al. 2021 |
| Dino-Group-IV       | order           | parasites   | Sommeria-Klein et al. 2021 |
| Dino-Group-V        | order           | parasites   | Sommeria-Klein et al. 2021 |
| Mamiellophyceae     | class           | phototrophs | Sommeria-Klein et al. 2021 |
| MAST-1              | class           | phagotrophs | Sommeria-Klein et al. 2021 |
| MAST-10             | class           | phagotrophs | Sommeria-Klein et al. 2021 |
| MAST-11             | class           | phagotrophs | Sommeria-Klein et al. 2021 |
| MAST-12             | class           | phagotrophs | Sommeria-Klein et al. 2021 |
| MAST-3              | class           | phagotrophs | Sommeria-Klein et al. 2021 |
| MAST-4              | class           | phagotrophs | Sommeria-Klein et al. 2021 |
| MAST-6              | class           | phagotrophs | Sommeria-Klein et al. 2021 |
| MAST-7              | class           | phagotrophs | Sommeria-Klein et al. 2021 |
| MAST-8              | class           | phagotrophs | Sommeria-Klein et al. 2021 |
| MAST-9              | class           | phagotrophs | Sommeria-Klein et al. 2021 |
| Mesomycetozoa       | division        | parasites   | Sommeria-Klein et al. 2021 |
| MOCH-1              | class           | phototrophs | Sommeria-Klein et al. 2021 |
| MOCH-2              | class           | phototrophs | Sommeria-Klein et al. 2021 |
| Mollusca            | class           | metazoans   | Sommeria-Klein et al. 2021 |
| Nassellaria         | order           | phagotrophs | Sommeria-Klein et al. 2021 |
| Nemertea            | class           | metazoans   | Sommeria-Klein et al. 2021 |
| Oomycota            | class           | parasites   | Sommeria-Klein et al. 2021 |
| Pelagophyceae       | class           | phototrophs | Sommeria-Klein et al. 2021 |
| Platyhelminthes     | class           | metazoans   | Sommeria-Klein et al. 2021 |
| Porifera            | class           | metazoans   | Sommeria-Klein et al. 2021 |
| Pyramimonadophyceae | class           | phototrophs | Sommeria-Klein et al. 2021 |
| RAD-A               | class           | phagotrophs | Sommeria-Klein et al. 2021 |
| RAD-B               | class           | phagotrophs | Sommeria-Klein et al. 2021 |
| RAD-C               | class           | phagotrophs | Sommeria-Klein et al. 2021 |

**Table S1:** *(continued)*

| Taxon             | Taxonomic level | Function    | Reference                  |
|-------------------|-----------------|-------------|----------------------------|
| Rhodophyta        | division        | phototrophs | Sommeria-Klein et al. 2021 |
| Spumellaria       | order           | phagotrophs | Sommeria-Klein et al. 2021 |
| Streptophyta      | division        | phototrophs | Sommeria-Klein et al. 2021 |
| Telonemia         | division        | phagotrophs | Sommeria-Klein et al. 2021 |
| Trebouxiophyceae  | class           | phototrophs | Sommeria-Klein et al. 2021 |
| Vannellida        | order           | phagotrophs | Sommeria-Klein et al. 2021 |
| Amoebozoa         | supergroup      | parasites   | Literature                 |
| Perkinsea         | division        | parasites   | Literature                 |
| Alveolata_X       | division        | parasites   | Literature                 |
| Dinoflagellata    | division        | phagotrophs | Literature                 |
| Apusozoa          | supergroup      | phagotrophs | Literature                 |
| Chlorophyta       | division        | phototrophs | Literature                 |
| Glaucophyta       | division        | phototrophs | Literature                 |
| Prasinodermophyta | division        | phototrophs | Literature                 |
| Centrohelioczoa   | division        | phagotrophs | Literature                 |
| Metamonada        | division        | parasites   | Literature                 |
| Picozoa           | division        | phagotrophs | Literature                 |
| Choanoflagellida  | division        | phagotrophs | Literature                 |
| Fungi             | division        | parasites   | Literature                 |
| Metazoa           | division        | metazoans   | Literature                 |
| Cercozoa          | division        | phagotrophs | Literature                 |
| Aurearenophyceae  | class           | phototrophs | Literature                 |
| Chrysomerothyceae | class           | phototrophs | Literature                 |
| Eustigmatophyceae | class           | phototrophs | Literature                 |
| MOCH-3            | class           | phototrophs | Literature                 |
| MOCH-4            | class           | phototrophs | Literature                 |
| MOCH-5            | class           | phototrophs | Literature                 |
| Phaeophyceae      | class           | phototrophs | Literature                 |
| Ochrophyta        | division        | phototrophs | Literature                 |
| Pinguicophyceae   | class           | phototrophs | Literature                 |
| Raphidophyceae    | class           | phototrophs | Literature                 |
| Synchromophyceae  | class           | phototrophs | Literature                 |
| Synurophyceae     | class           | phototrophs | Literature                 |
| Xanthophyceae     | class           | phototrophs | Literature                 |
| MAST-16           | class           | phagotrophs | Literature                 |

**Table S1:** *(continued)*

| Taxon           | Taxonomic level | Function    | Reference  |
|-----------------|-----------------|-------------|------------|
| MAST-22         | class           | phagotrophs | Literature |
| MAST-24         | class           | phagotrophs | Literature |
| Opalozoa        | division        | parasites   | Literature |
| Pseudofungi     | division        | parasites   | Literature |
| Sagenista       | division        | phagotrophs | Literature |
| Stramenopiles   | supergroup      | phagotrophs | Literature |
| Discoba         | division        | parasites   | Literature |
| Archaeplastida  | supergroup      | phototrophs | Literature |
| Eukaryota_X     | supergroup      | parasites   | Literature |
| Malawimonadidae | division        | parasites   | Literature |
| Radiolaria      | division        | phagotrophs | Literature |
| Protalveolata   | supergroup      | phagotrophs | Literature |

**Table S2:** Eukaryotic 18S rRNA primers used for metaPR2 datasets with the number of datasets (N) where used (Table 1).

| Name            | Sequence               | Region | Direction | Reference                    | DOI                              | N  |
|-----------------|------------------------|--------|-----------|------------------------------|----------------------------------|----|
| TAReuk454FWD1   | CCAGCASCYCGCGTAATTCC   | V4     | fwd       | Stoeck et al (2010)          | 10.1111/j.1365-294X.2009.04480.x | 21 |
| E572F           | CYCGGTAATTCCAGCTC      | V4     | fwd       | Comeau et al. (2011)         | 10.1371/journal.pone.0027492     | 7  |
| 3NDF            | GGCAAGTCTGGTGCCAG      | V4     | fwd       | Cavalier-Smith et al. (2009) | 10.1016/j.protis.2009.03.003     | 2  |
| 528F            | GCGGTAATTCAGTCCAA      | V4     | fwd       | Cheung et al. (2010)         | 10.1038/ismej.2010.26            | 2  |
| NSF573          | CGCGTAATTCAGTCCA       | V4     | fwd       | Mangot et al. (2013)         | 10.1111/1462-2920.12065          | 2  |
| 1380F           | CCCTGCCHTTGTACACAC     | V9     | fwd       | Amaral Zettler et al (2009)  | 10.1371/journal.pone.0006372     | 1  |
| 1389F           | TTGTACACACCGCCC        | V9     | fwd       | Amaral Zettler et al (2009)  | 10.1371/journal.pone.0006372     | 1  |
| 515F            | GTGCCAGCMGCCGCGTAA     | V4     | fwd       | Parfrey et al. (2014)        | 10.3389/fmicb.2014.00298         | 1  |
| 528F            | CCGCGTAATTCAGCTC       | V4     | fwd       | Zhu et al. (2005)            | 10.1016/j.femsec.2004.10.006     | 1  |
| EK-565F         | GCAGTAAAAAGCTCGTAGT    | V4     | fwd       | Simon et al. (2015)          | 10.1111/1462-2920.12591          | 1  |
| EuF-V4          | CCAGCASCYCGGTAATWCC    | V4     | fwd       | Boscaro et al. (2017)        | 10.1007/s00248-016-0912-8        | 1  |
| EuF-V4          | CCAGCASCYCGGTAATWCC    | V4     | fwd       | Belevich et al. (2017)       | 10.1007/s00248-017-1076-x        | 1  |
| TAReukFWD1      | CCAGCASCYCGGTAAT       | V4     | fwd       | Annenkova et al. (2020)      | 10.3390/microorganisms8040543    | 1  |
| TAReukREV3      | ACTTTCGTTCTTGATYRA     | V4     | rev       | Stoeck et al (2010)          | 10.1111/j.1365-294X.2009.04480.x | 15 |
| V4 18S Next.Rev | ACTTTCGTTCTTGATYRATGA  | V4     | rev       | Piredda et al. (2017)        | 10.1093/femsec/fiw200            | 7  |
| E1009R          | AYGGTATCTRATCRTCTTYG   | V4     | rev       | Comeau et al. (2011)         | 10.1371/journal.pone.0027492     | 6  |
| 1055R           | ACGGCCATGCACCACCCAT    | V4     | rev       | Alves-de-Souza et al (2011)  | 10.5194/bg-8-2125-2011           | 2  |
| 1510R           | CCTTCYGCAGTTCCACCTAC   | V9     | rev       | Lopez-Garcia et al. (2003)   | 10.1073/pnas.0235779100          | 2  |
| NSR951          | TTGGYRAATGCTTTCGC      | V4     | rev       | Mangot et al. (2013)         | 10.1111/1462-2920.12065          | 2  |
| V4_euk_R2       | ACGGTATCTRATCRTCTTCG   | V4     | rev       | Brate et al. (2010)          | 10.1038/ismej.2010.39            | 2  |
| 1119r           | GGTGCCCTCCGTC          | V4     | rev       | Parfrey et al. (2014)        | 10.3389/fmicb.2014.00298         | 1  |
| 897R            | TCYDAGAATTYCACCTCT     | V4     | rev       | Hugerth et al. (2014)        | 10.1371/journal.pone.0095567     | 1  |
| EUK1134-R       | TTTAAGTTTCAGCCTTGCG    | V4     | rev       | Carnegie et al. (2003)       | 10.3354/dao054219                | 1  |
| Nex_18S_0964_R  | GATCCCYAACTTTCGTTCTTGA | V4     | rev       | Kim et al. (2016)            | 10.1111/1462-2920.13523          | 1  |
| picoR2          | AKCCCCYAACTTTCGTTCTTGA | V4     | rev       | Belevich et al. (2017)       | 10.1007/s00248-017-1076-x        | 1  |

**Table S3:** 18S rRNA primer sets used for metaPR2 datasets with the number of datasets (N) where used (Table 1). Refer to Table S2 for sequence and reference of primers.

| Primer fwd     | Primer rev      | Region | N  |
|----------------|-----------------|--------|----|
| TAReuk454FWD1  | TAReukREV3      | V4     | 14 |
| TAReuk454FWD1  | V4 18S Next.Rev | V4     | 7  |
| E572F          | E1009R          | V4     | 6  |
| 3NDF           | V4_euk_R2       | V4     | 2  |
| 528F           | 1055R           | V4     | 2  |
| NSF573         | NSR951          | V4     | 2  |
| 1380F          | 1510R           | V9     | 1  |
| 1389F          | 1510R           | V9     | 1  |
| E572F          | 897R            | V4     | 1  |
| EK-565F        | UNonMet         | V4     | 1  |
| EuF-V4         | picoR2          | V4     | 1  |
| F515           | R119            | V4     | 1  |
| Nex_18S_0587_F | Nex_18S_0964_R  | V4     | 1  |
| TAReukFWD1     | TAReukREV3      | V4     | 1  |

## A - MAST8

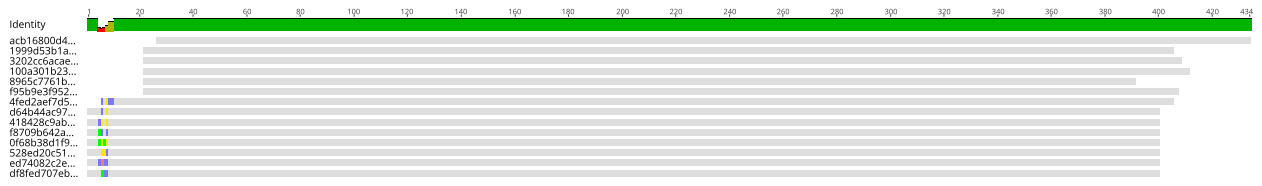

## B - Ciliate

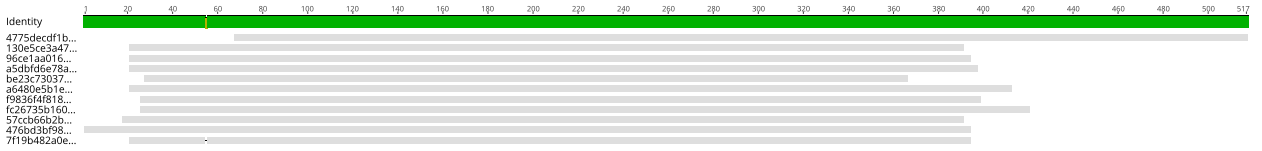

**Figure S1:** Two examples of V4 sequence clusters ASV (cASV) for Stramenopiles MAST 8 (A) and ciliates (B).

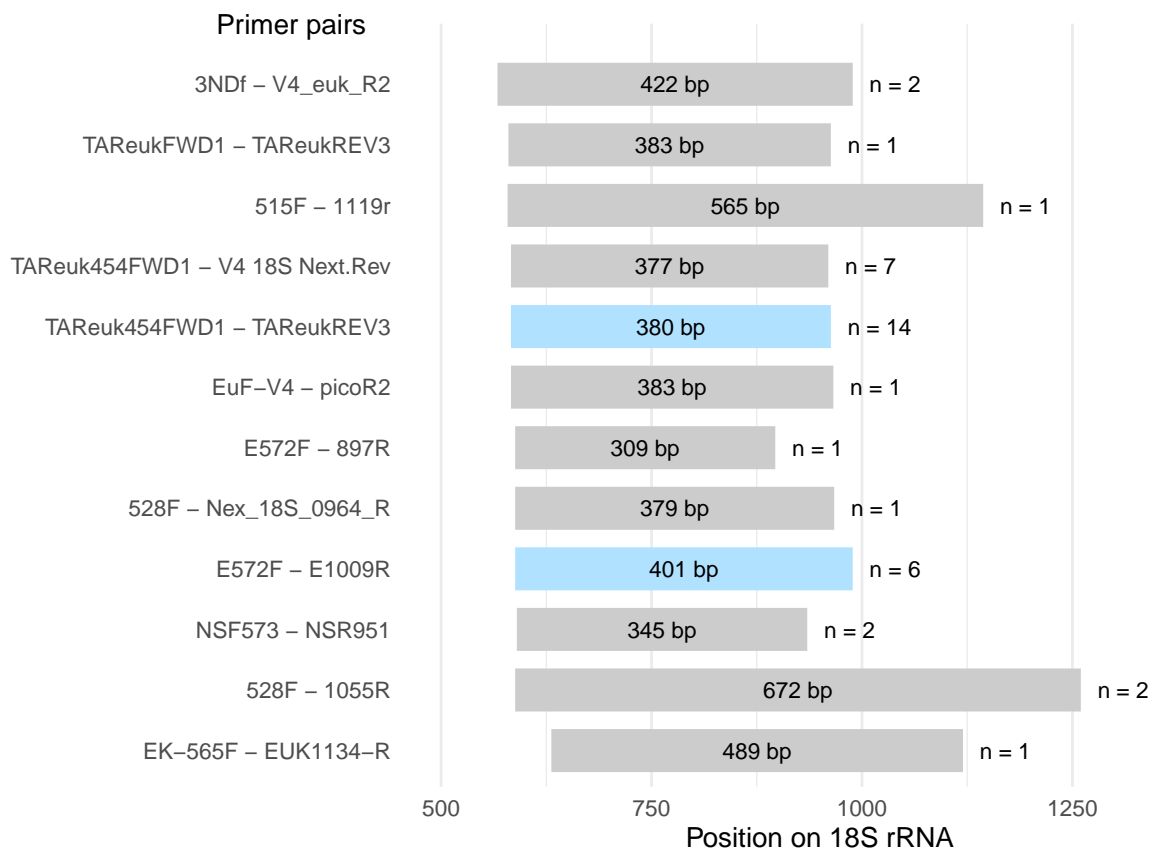

**Figure S2:** Amplicon size and position on the 18S rRNA gene (yeast), with the number of datasets for each V4 primer pair on the right side.



## Number of samples

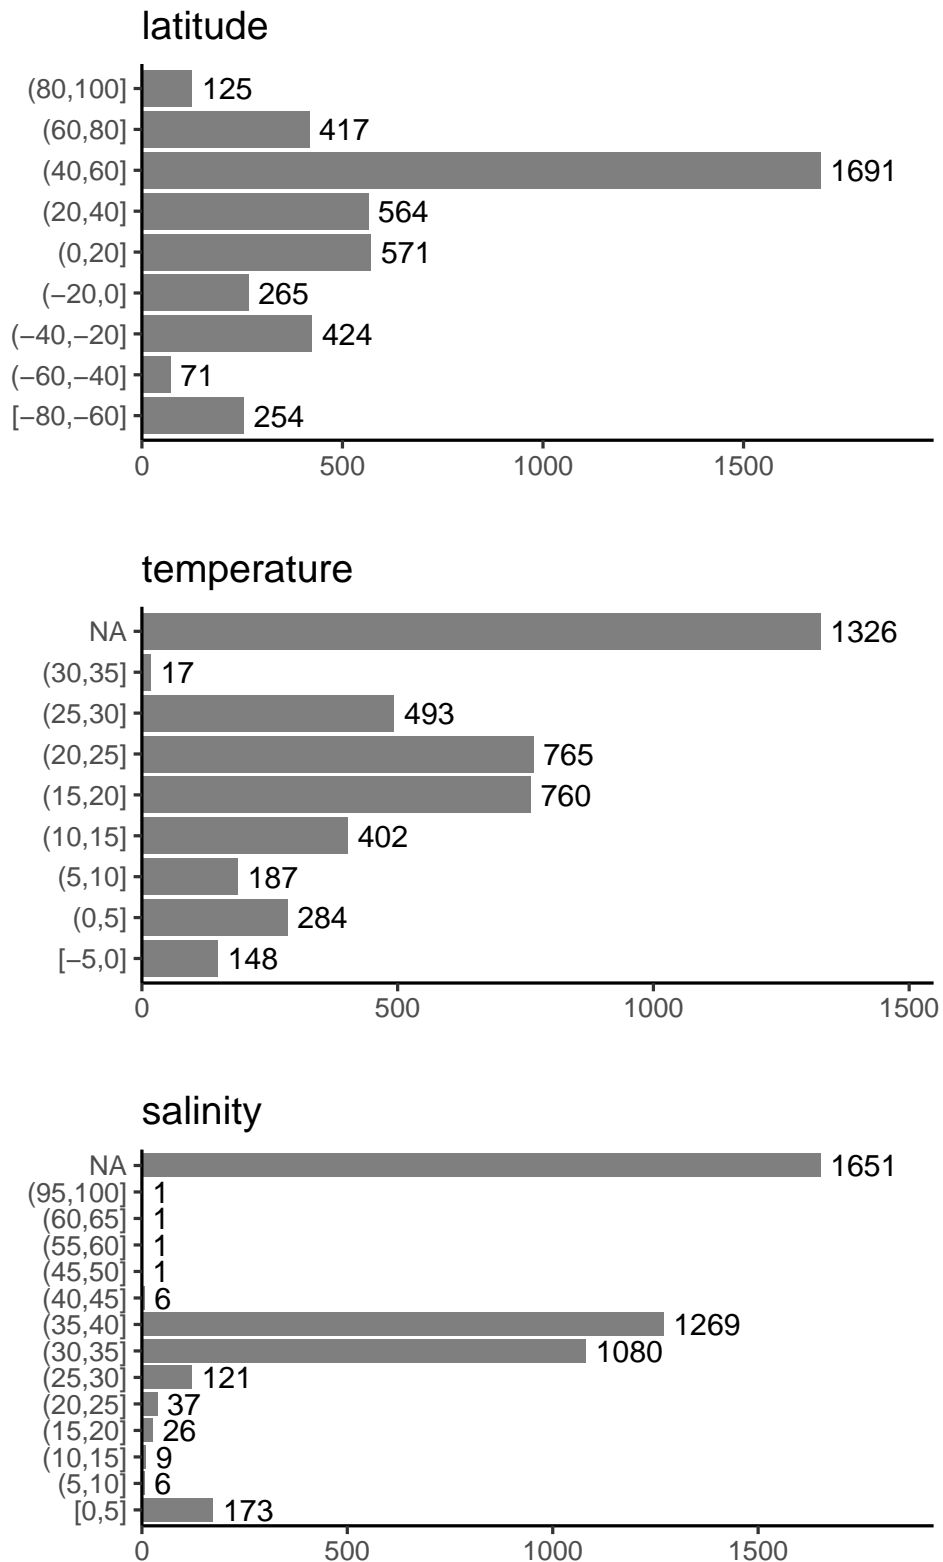

**Figure S3:** Distribution of samples by latitude, temperature and salinity ranges. NA corresponds to samples for which the data are not available.

Reads

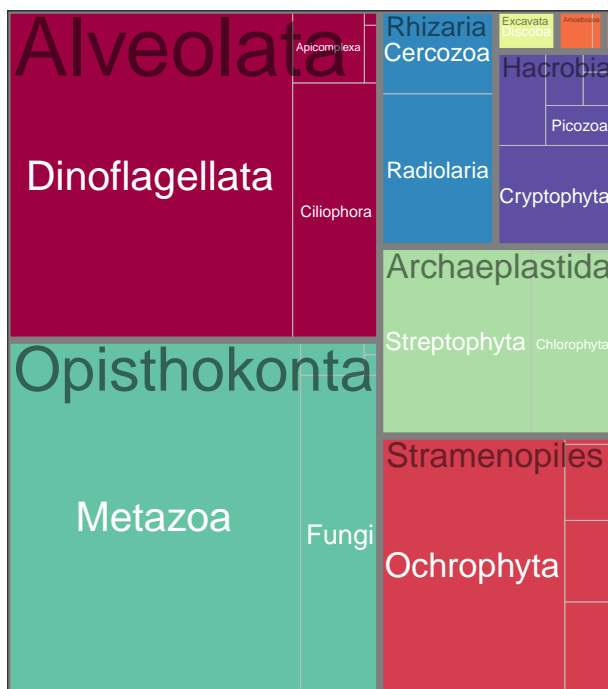

cASVs

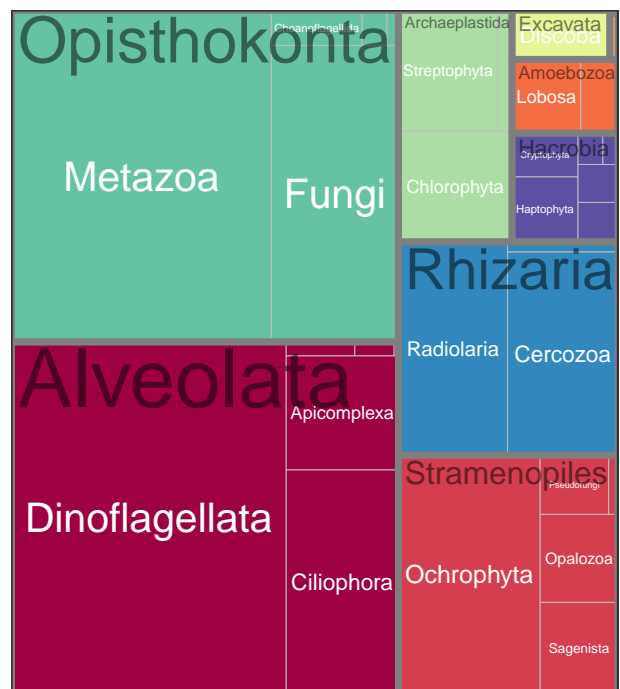

**Figure S4:** Treemaps of most abundant taxa (supergroup and division) for all datasets (V4 and V9) based on number of reads after normalization (left) or number of cASVs (right).

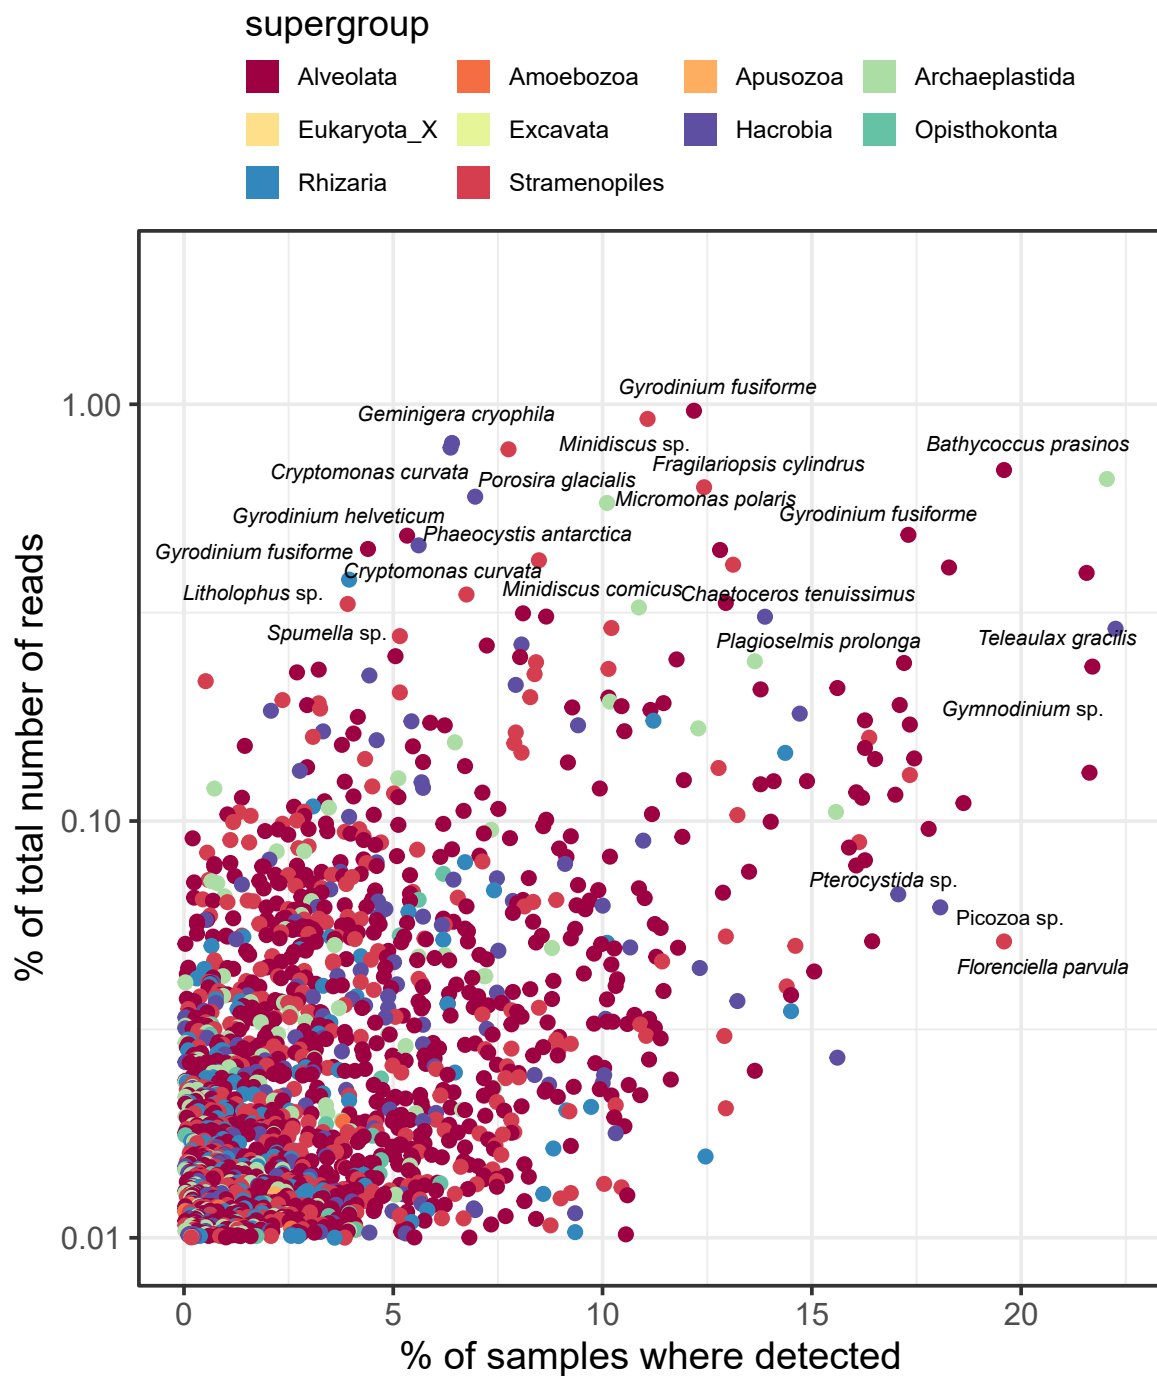

**Figure S5:** Protist V4 cASVs. Relationships between frequency and abundance of cASVs. Colours correspond to supergroups.

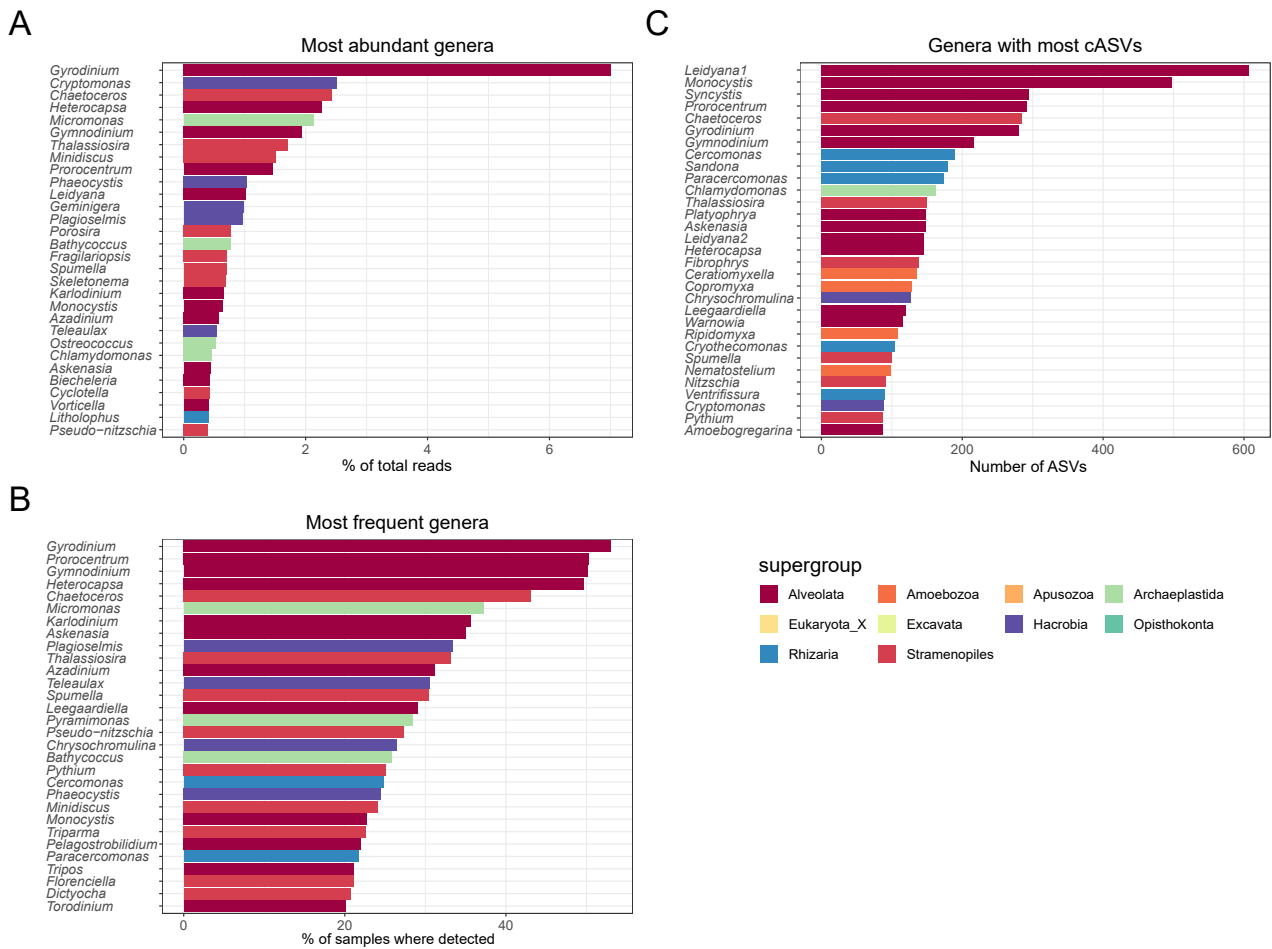

**Figure S6:** Protist genus analysis for the V4 dataset after normalization. A. Most abundant genera. B. Most frequent genera. C. Genera with most cASVs.

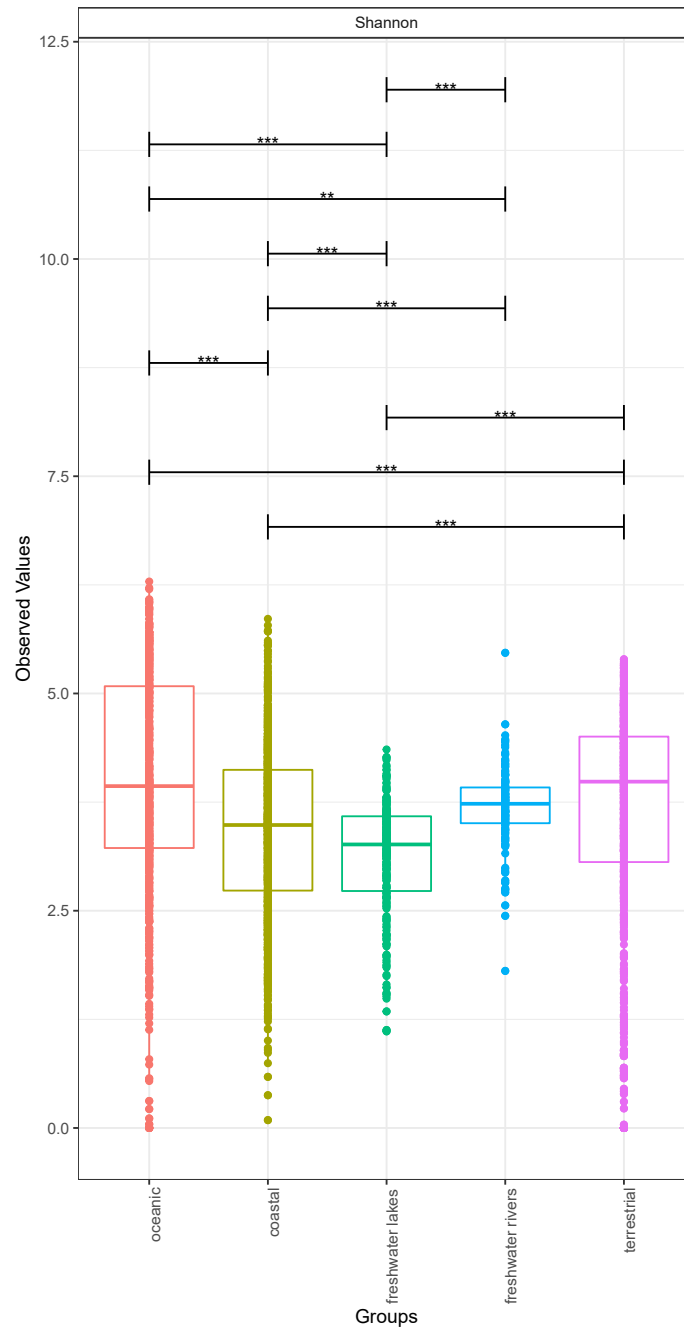

**Figure S7:** Protist V4 ASVs. Shannon's diversity index as a function of the environment with significance (\*\* p-value < 0.01, \*\*\* p-value < 0.001).

Datasets Treemap Map Barplot Diversity Query Download About

# metaPR2

DOI [10.5281/zenodo.6507135](https://doi.org/10.5281/zenodo.6507135) release **1.0.3** date 30 April 2022

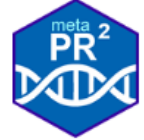

## A database of 18S rRNA metabarcodes

Database version: 1.1 - 41 datasets

Shiny application version: 1.0.3

### Presentation

MetaPR2 is a database of published 18S rRNA metabarcodes that have been reprocessed and assigned using PR2.

### Accessing the database

Access to the database to map, search and download the barcodes can be done in three different ways:

- Using a [web interface](#).
- Download the R package and launch the shiny application.

#### 1 - Web interface

- Launch in your browser: <http://shiny.metapr2.org>
- Help : <https://pr2database.github.io/metapr2-shiny/articles/>

#### 2 - metaPR2 shiny R package

- Install the package from GitHub and launch function `metapr2App()`

```
install.packages(devtools)

devtools::install_github("pr2database/metapr2-shiny")
metapr2::metapr2App()
```

Note: You may have to install some packages required by metapr2 if they are not installed on your machine

### Help

Extensive help is provided [here](#).

### Errors

Please report errors in the [Issues page](#) of the metaPR2 database.

### Citation

Vaulot, D., Sim, C.W.H., Ong, D., Teo, B., Biver, C., Jamy, M., Lopes dos Santos, A., 2022. metaPR2: a database of eukaryotic 18S rRNA metabarcodes with an emphasis on protists. *BioRxiv*. <https://doi.org/10.1101/2022.02.04.479133>

### Resources

- Website: <https://shiny.metapr2.org/>
- Docker: <https://hub.docker.com/repository/docker/vaulot/metapr2>
- Source code: <https://github.com/pr2database/metapr2-shiny>

### Maintainer

- Daniel Vaulot: [vaulot@gmail.com](mailto:vaulot@gmail.com)

### Contributors

- Daniel Vaulot, CNRS Roscoff, NTU-ASE Geek lab
- Adriana Lopes dos Santos, NTU-ASE Geek lab
- Clarence Sim, NTU-ASE Geek lab
- Denise Ong, NTU-ASE Geek lab
- Bryan Teo, NTU-ASE Geek lab
- Charlie Biver, Uppsala University Sweden
- Mahwash Jamy, Uppsala University Sweden

Figure S8: Shiny panel "About".



The metaPR2 database

Select datasets

41 items selected

Select All Deselect All

- Antarctic\_Fieldees\_Bay\_2013 ✓
- Antarctic\_Fieldees\_Bay\_2015\_18S\_V4 ✓
- Antarctic\_Fieldees\_Bay\_2015\_18S\_V4\_sorted ✓
- Arctic\_Baffin\_Bay\_2013 ✓
- Arctic\_Beaufort\_Sea\_MALINA\_2014 ✓
- Arctic\_Nansen\_Basin\_2012 ✓
- Arctic\_Nares\_Strait\_2014 ✓
- Arctic\_Ocean\_Central\_2012 ✓
- Arctic\_Ocean\_PS80\_2012 ✓
- Arctic\_Ocean\_Survey\_2005\_2011 ✓
- Arctic\_White\_Sea\_2013\_2015 ✓
- Baltic\_Sea\_2012\_2013 ✓
- Baltic\_Sea\_Gdansk\_2012 ✓
- Chukchi\_Sea\_IGESCAPE\_2010 ✓
- European\_coast\_Biomarkers\_2009 ✓
- Italy\_Naples\_2011 ✓
- Lake\_Baikal\_2013 ✓
- Lake\_Chaohu\_2014\_2015 ✓
- Lake\_Chevreuse\_2012 ✓
- Lake\_Fuxian\_2015 ✓
- Lake\_Garda ✓
- Lakes\_Argentina ✓
- Lakes\_mountain\_2013 ✓
- Lakes\_Scandinavia ✓
- Malaspina\_surface\_2010\_2011 ✓
- Malaspina\_vertical\_2010\_2011 ✓
- Mariana\_Trench\_2016\_1 ✓
- Mariana\_Trench\_2016\_2 ✓
- Norway\_Oslo\_fjord\_2009\_2011 ✓
- OSD\_2014\_V4\_LGC ✓
- OSD\_2014\_V4\_LW ✓
- OSD\_2015\_V4 ✓
- River\_Parana ✓
- River\_Saint\_Charles\_2016\_2017 ✓
- Soils\_Global\_2012 ✓
- Soils\_Neotropical ✓
- Soils\_Swiss ✓
- Spain\_Blanes\_2004\_2013 ✓
- Tara\_Arctic\_V4 ✓
- Tara\_Ocean\_V4 ✓
- Tara\_Oceans\_V9 ✓

All

About Datasets Treemap Map Barplot Diversity Query Download Help

Quick dataset selection.

Dataset groups

marine\_global\_V4  oceanic  coastal  rivers  lakes  soils  arctic  antarctic  temperate  tropical  time series

Show 10 entries Search:

| dataset_id | dataset_name                                     | region         | paper_reference                                                                                                                                                                                                                                                                                                                                                                                                           | sample_number | asv_number | n_reads_mean | selected |
|------------|--------------------------------------------------|----------------|---------------------------------------------------------------------------------------------------------------------------------------------------------------------------------------------------------------------------------------------------------------------------------------------------------------------------------------------------------------------------------------------------------------------------|---------------|------------|--------------|----------|
| 11         | Antarctic Fieldees Bay- 2013                     | Southern Ocean | Luo, W. et al. Molecular diversity of microbial eukaryotes in sea water from Fildes Peninsula, King George Island, Antarctica. <i>Polar Biol.</i> (2015)                                                                                                                                                                                                                                                                  | 10            | 69         | 13631        | true     |
| 16         | Antarctic Fieldees Bay 2015 18S V4               | Southern Ocean | Trefault, N., De la Iglesia, R., Moreno-Pino, M., Lopes dos Santos, A., G-e9-rikas Ribeiro, C., Parada-Pozo, G., Cristi, A., Marie, D., & Vaulot, D. (2021). Annual phytoplankton dynamics in coastal waters from Fildes Bay, Western Antarctic Peninsula. <i>Scientific Reports</i> , 11(1), 1368.                                                                                                                       | 123           | 685        | 48261        | true     |
| 18         | Antarctic Fieldees Bay 2015 18S V4 sorted        | Southern Ocean | Trefault, N., De la Iglesia, R., Moreno-Pino, M., Lopes dos Santos, A., G-e9-rikas Ribeiro, C., Parada-Pozo, G., Cristi, A., Marie, D., & Vaulot, D. (2021). Annual phytoplankton dynamics in coastal waters from Fildes Bay, Western Antarctic Peninsula. <i>Scientific Reports</i> , 11(1), 1368.                                                                                                                       | 60            | 280        | 31615        | true     |
| 9          | Arctic Nansen Basin - 2012                       | Arctic Ocean   | Metties, K., von Appen, W.-J., Killas, E., Nicolaus, A. & N-16>thg, E.-M. Biogeography and Photosynthetic Biomass of Arctic Marine Pico-Eukaryotes during Summer of the Record Sea Ice Minimum 2012. <i>PLoS One</i> 11, 20 pp. (2016)                                                                                                                                                                                    | 17            | 328        | 13700        | true     |
| 42         | Arctic Nares Strait - 2014                       | Arctic Ocean   | Kalenitchenko D., Joli N., Potvin M., Tremblay J.-c&e9-, Lovejoy C. 2019. Biodiversity and Species Change in the Arctic Ocean: A View Through the Lens of Nares Strait. <i>Frontiers in Marine Science</i> 6:1-96>17.                                                                                                                                                                                                     | 247           | 1510       | 38626        | true     |
| 6          | Arctic Ocean Central - 2012                      | Arctic Ocean   | Stecher, A., Neuhaus, S., Lange, B., Frickenhaus, S., Beszteri, B., Kroth, P.G. & Valentin, K. 2015. rRNA and rDNA based assessment of sea ice protist biodiversity from the central Arctic Ocean. <i>Eur. J. Phycol.</i> 1-96>16.                                                                                                                                                                                        | 8             | 182        | 36628        | true     |
| 40         | Arctic Ocean Survey - 2005- 2011                 | Arctic Ocean   | Thaler M., Lovejoy C., Sea B. 2015. Biogeography of Heterotrophic Flagellate Populations Indicates the Presence of Generalist and Specialist Taxa in the Arctic Ocean. <i>Applied and Environmental Microbiology</i> 81.2137-96>2148                                                                                                                                                                                      | 36            | 467        | 7136         | true     |
| 5          | Arctic Ocean, Beaufort Sea, MALINA cruise - 2009 | Arctic Ocean   | Monier, A., Terrado, R., Thaler, M., Comeau, A., Medrinal, E. & Lovejoy, C. 2013. Upper Arctic Ocean water masses harbor distinct communities of heterotrophic flagellates. <i>Biogeosciences</i> . 10:4273-96>88. Monier, A., Comte, J., Babin, M., Forest, A., Matsuoka, A. & Lovejoy, C. 2014. Oceanographic structure drives the assembly processes of microbial eukaryotic communities. <i>ISME J.</i> 9:990-96>1002 | 24            | 270        | 6704         | true     |
| 39         | Arctic Polarstern expedition ARK-XXVII/3 - 2012  | Arctic Ocean   | Rapp J.Z., Fern-s1>ndez, M-e9>ndez M., Bienhold C., Boetius A. 2018. Effects of Ice-Algal Aggregate Export on the Connectivity of Bacterial Communities in the Central Arctic Ocean. <i>Frontiers in Microbiology</i> 9:1035                                                                                                                                                                                              | 45            | 978        | 73833        | true     |
| 38         | Arctic White Sea - 2013-2015                     | Arctic Ocean   | Belevich TA., Ilyash L.V., Milyutina IA., Logacheva MD., Goryunov D.V., Troitsky A.V. 2017. Photosynthetic Picoeukaryotes in the Land-Fast Ice of the White Sea, Russia. <i>Microbial Ecology</i> . 1-96>16.                                                                                                                                                                                                              | 17            | 380        | 23990        | true     |

Showing 1 to 10 of 41 entries

Previous 1 2 3 4 5 Next

Figure S9: Shiny panel "Datasets".



The metaPR2 database

Select datasets

41 items selected

Select Samples

Gene regions

V4

DNA or RNA

DNA

Ecosystems

oceanic, coastal, freshwater lakes, freshwater riv

Substrates

water

Size fractions

pico, total

Depth levels

surface

Select ASVs

Minimum number of total reads per ASV

1000

Select Taxa

Supergroup

All

Division

All

Class

All

Order

All

Family

All

Genus

All

Species

All

Figure S10: Shiny sample and taxonomy selection sidebar.



[About](#) [Datasets](#) [Treemap](#) [Map](#) [Barplot](#) [Alpha diversity](#) [Beta diversity](#) [Query](#) [Download](#)

Number of reads have been normalized (not rarefield) to 100 with 3 decimals.

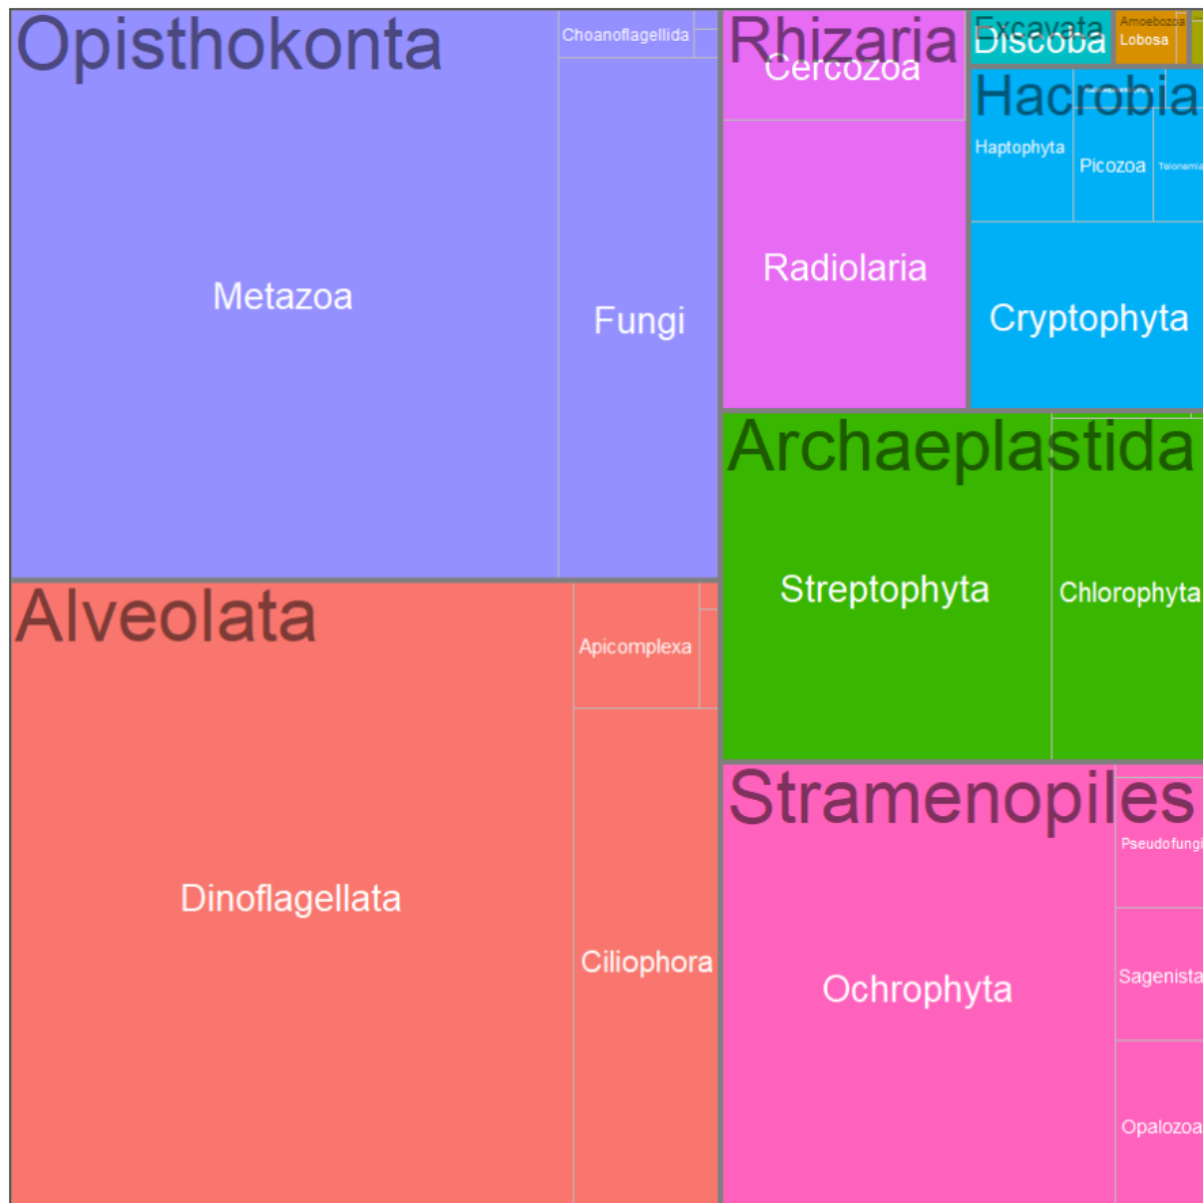

**Figure S11:** Shiny panel "Treemap".



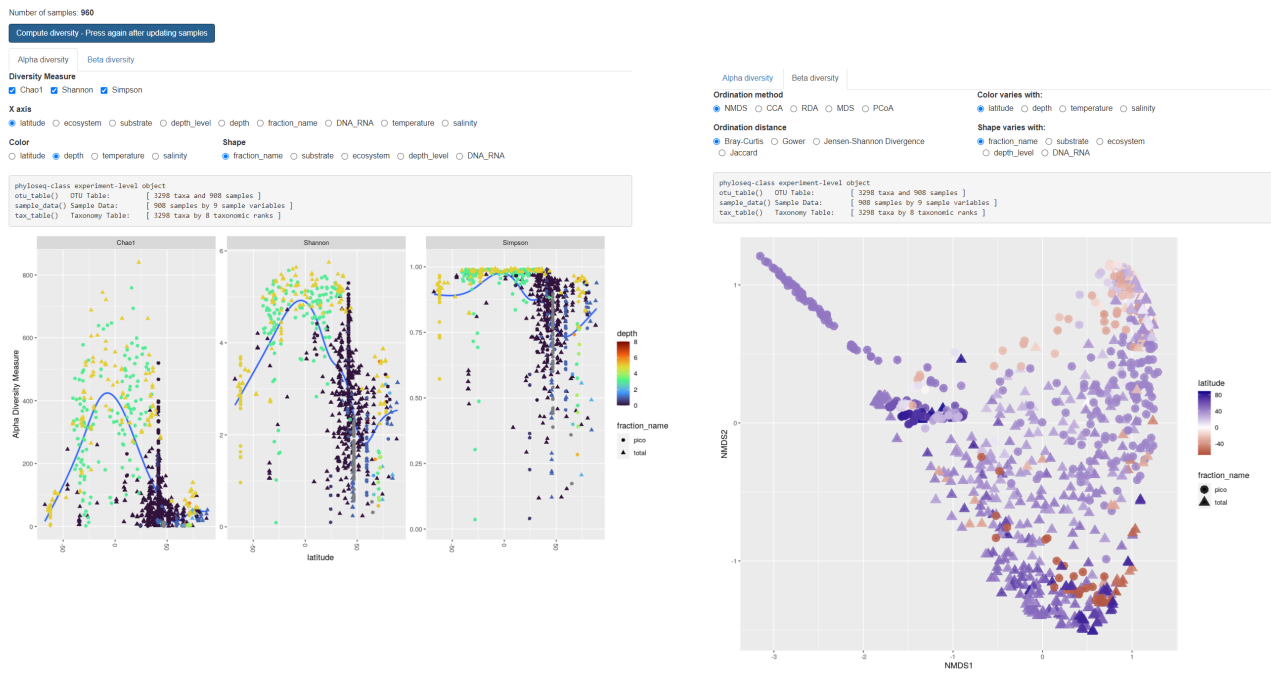

Figure S14: Shiny panel "Diversity".

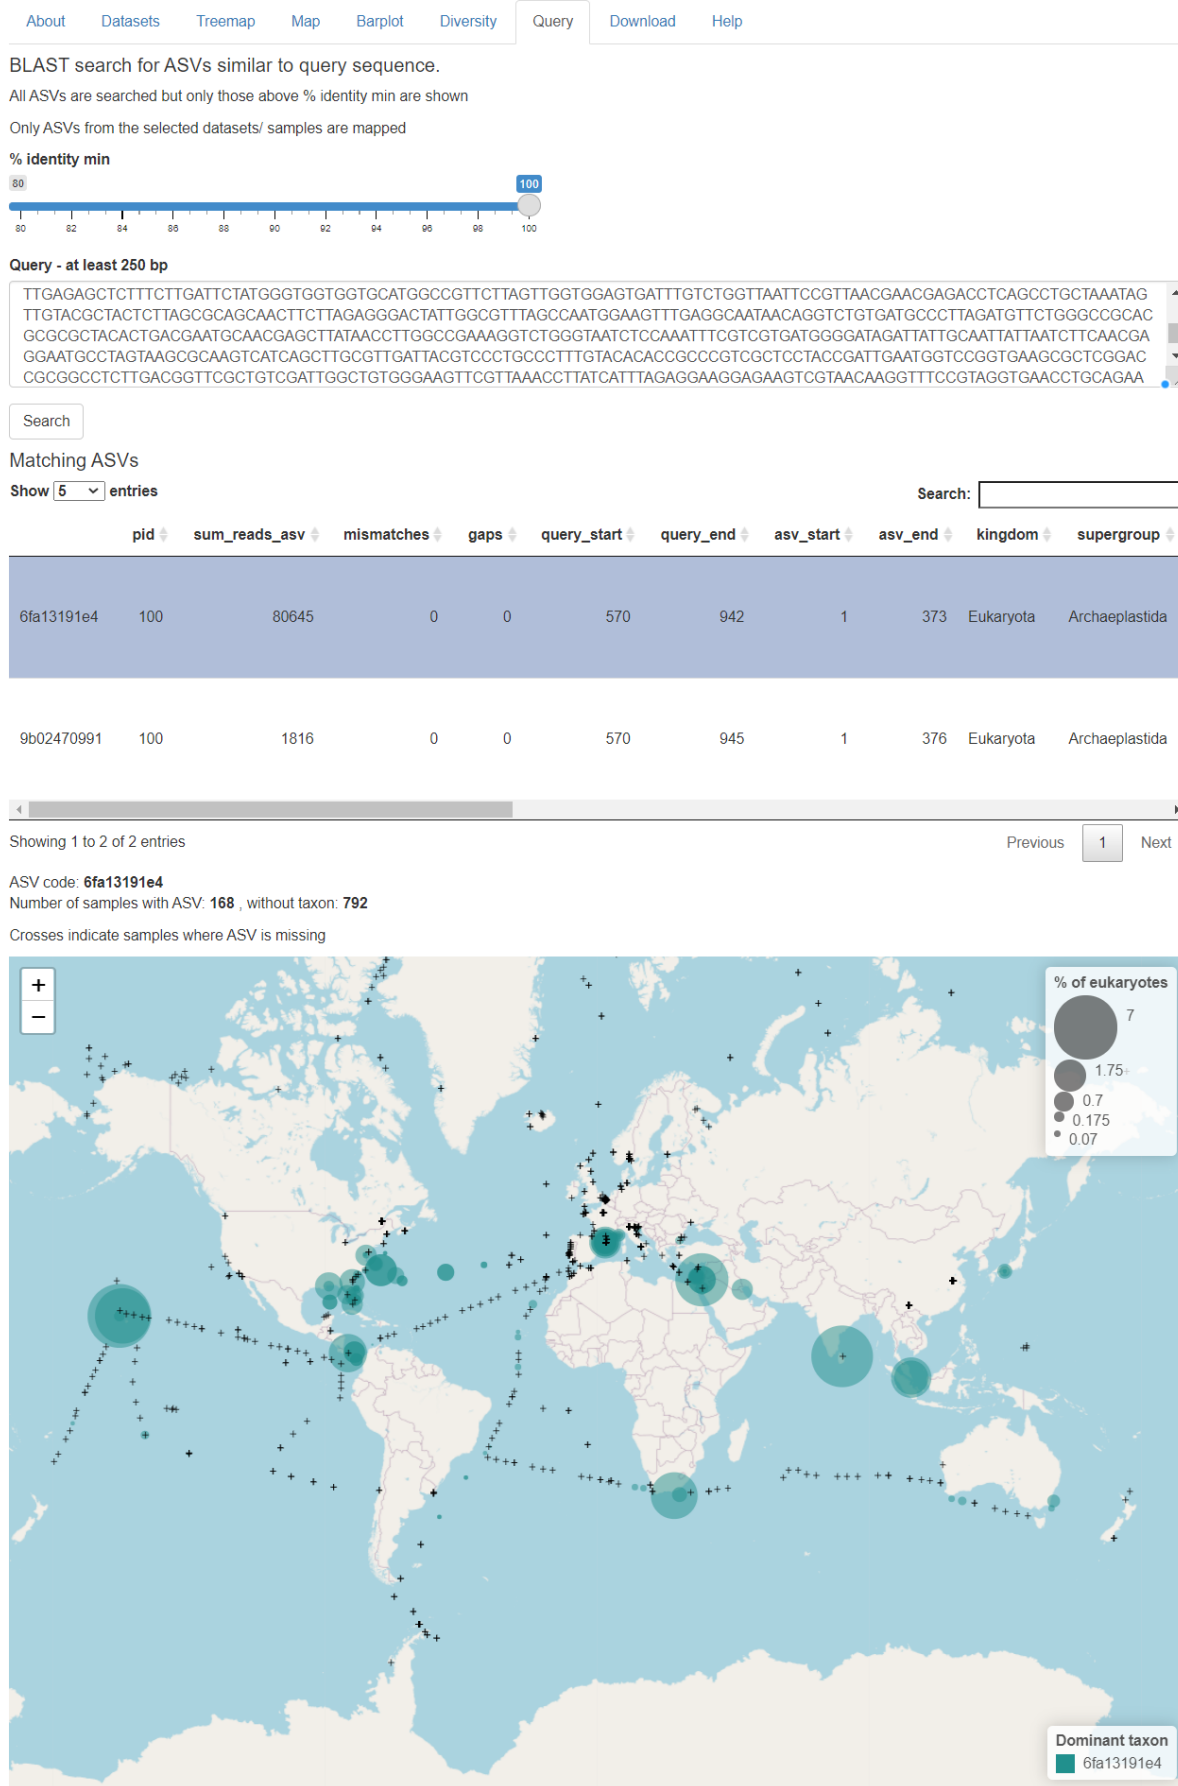

Figure S15: Shiny panel "Query".

[About](#)
[Datasets](#)
[Treemap](#)
[Map](#)
[Barplot](#)
[Diversity](#)
[Query](#)
[Download](#)
[Help](#)

### Selected damples, datasets and taxa

The following files are provided. They can be linked by key fields. They only contain the selected datasets, sample type and taxa. **The asv\_reads and phyloseq files can be very big** if you download all datasets and all taxa. Phyloseq files will only be created for less than 1000 samples selected.

| file             | content                                                                                                                                                       | key fields              |
|------------------|---------------------------------------------------------------------------------------------------------------------------------------------------------------|-------------------------|
| datasets.xlsx    | Information on the different datasets selected including reference and GenBank id                                                                             | dataset_id              |
| samples.xlsx     | List of samples selected with medadata                                                                                                                        | file_code               |
| asv.xlsx         | ASV selected with taxonomy and sequence                                                                                                                       | asv_code                |
| asv_reads.tsv.gz | Percent of reads (normalized to total number of eukaryotic reads in the sample), for each ASV and each sample (long form).                                    | asv_code, file_code     |
| phyloseq.rds     | File to use with phyloseq R package ( <a href="https://joey711.github.io/phyloseq/">https://joey711.github.io/phyloseq/</a> ). Use readRDS() function to read | <b>5000 samples max</b> |

Number of samples: **960**

[Download datasets, samples and ASVs \(zip\)](#)
[Download ASVs abundance \(tsv.gz\)](#)

```

Make phyloseq done
phyloseq-class experiment-level object
otu_table() OTU Table: [ 3298 taxa and 908 samples ]
sample_data() Sample Data: [ 908 samples by 9 sample variables ]
tax_table() Taxonomy Table: [ 3298 taxa by 8 taxonomic ranks ]
phyloseq-class experiment-level object
otu_table() OTU Table: [ 3298 taxa and 908 samples ]
sample_data() Sample Data: [ 908 samples by 9 sample variables ]
tax_table() Taxonomy Table: [ 3298 taxa by 8 taxonomic ranks ]

```

[Download phyloseq file \(rds\)](#)

**Figure S16:** Shiny panel "Download".
